# Supplementary material for: Identification and validation of a hypoxia-immune signature for overall survival prediction in lung adenocarcinoma
Source: Front Genet. 2022 Oct 3;13:975279. doi: 10.3389/fgene.2022.975279 (PMC9573950; doi:10.3389/fgene.2022.975279)
Supplement: Supplementary file 1 [file Table2.XLSX]

## Sheet: Sheet1
hypoxia‐related genes
PGK1
PDK1
GBE1
PFKL
ALDOA
ENO2
PGM1
NDRG1
HK2
ALDOC
GPI
MXI1
SLC2A1
P4HA1
ADM
P4HA2
ENO1
PFKP
AK4
FAM162A
PFKFB3
VEGFA
BNIP3L
TPI1
ERO1A
KDM3A
CCNG2
LDHA
GYS1
GAPDH
BHLHE40
ANGPTL4
JUN
SERPINE1
LOX
GCK
PPFIA4
MAFF
DDIT4
SLC2A3
IGFBP3
NFIL3
FOS
RBPJ
HK1
CITED2
ISG20
GALK1
WSB1
PYGM
STC1
ZNF292
BTG1
PLIN2
CSRP2
VLDLR
JMJD6
EXT1
F3
PDK3
ANKZF1
UGP2
ALDOB
STC2
ERRFI1
ENO3
PNRC1
HMOX1
PGF
GAPDHS
CHST2
TMEM45A
BCAN
ATF3
CAV1
AMPD3
GPC3
NDST1
IRS2
SAP30
GAA
SDC4
STBD1
IER3
PKLR
IGFBP1
PLAUR
CAVIN3
CCN5
LARGE1
NOCT
S100A4
RRAGD
ZFP36
EGFR
EDN2
IDS
CDKN1A
RORA
DUSP1
MIF
PPP1R3C
DPYSL4
KDELR3
DTNA
ADORA2B
HS3ST1
CAVIN1
NR3C1
KLF6
GPC4
CCN1
TNFAIP3
CA12
HEXA
BGN
PPP1R15A
PGM2
PIM1
PRDX5
NAGK
CDKN1B
BRS3
TKTL1
MT1E
ATP7A
MT2A
SDC3
TIPARP
PKP1
ANXA2
PGAM2
DDIT3
PRKCA
SLC37A4
CXCR4
EFNA3
CP
KLF7
CCN2
CHST3
TPD52
LXN
B4GALNT2
PPARGC1A
BCL2
GCNT2
HAS1
KLHL24
SCARB1
SLC25A1
SDC2
CASP6
VHL
FOXO3
PDGFB
B3GALT6
SLC2A5
SRPX
EFNA1
GLRX
ACKR3
PAM
TGFBI
DCN
SIAH2
PLAC8
FBP1
TPST2
PHKG1
MYH9
CDKN1C
GRHPR
PCK1
INHA
HSPA5
NDST2
NEDD4L
TPBG
XPNPEP1
IL6
SLC6A6
MAP3K1
LDHC
AKAP12
TES
KIF5A
LALBA
COL5A1
GPC1
HDLBP
ILVBL
NCAN
TGM2
ETS1
HOXB9
SELENBP1
FOSL2
SULT2B1
TGFB3
